# Supplementary material for: A self-supported Ni–Co perselenide nanorod array as a high-activity bifunctional electrode for a hydrogen-producing hydrazine fuel cell
Source: Royal Society of Chemistry journal article supplement (doi:10.1039/c8ta06827e), 2018-01-01
Supplement: c8ta06827e1.pdf [file c8ta06827e1.pdf]

# **Self-supported Ni-Co Perselenide Nanorod Array as High-activity Bifunctional Electrodes for Hydrogen Production Hydrazine Fuel Cell**

Genxiang Wang<sup>a,b</sup>, Junxiang Chen<sup>a</sup>, Pingwei Cai<sup>a,b</sup>, Jingchun Jia<sup>a</sup>, and Zhenhai Wen <sup>\*a</sup>

*<sup>a</sup>CAS Key Laboratory of Design and Assembly of Functional Nanostructures, and Fujian Provincial Key*

*Laboratory of Nanomaterials, Fujian Institute of Research on the Structure of Matter, Chinese Academy of*

*Sciences, Fuzhou, Fujian 350002, China*

*<sup>b</sup>University of Chinese Academy of Sciences, Beijing 100049, P. R. China*

\*E-mail: wen@fjirsm.ac.cn

## Contents

|                                                       |    |
|-------------------------------------------------------|----|
| <b>1. Electrochemical neutralization energy</b> ..... | 3  |
| <b>2. Production quantification</b> .....             | 5  |
| <b>3. Theoretical Calculation Details</b> .....       | 7  |
| <b>4. Figures S1-S16</b> .....                        | 10 |
| <b>5. Tables S1-S6</b> .....                          | 25 |
| <b>6. References</b> .....                            | 32 |

## 1. Electrochemical neutralization energy

As the pourbaix diagram of water (Figure S15) displayed, the hydrogen evolution reaction (HER) and oxygen evolution reaction (OER) are sensitive to the pH of electrolytes. When the electrolyzer operates in a symmetrical electrolyte, the theoretical applied voltage for water splitting (HER&OER) is always 1.23 V. However, when the HER was performed in acid electrolyte while OER performed in alkaline electrolyte forming an asymmetric-electrolyte electrolyzer, the applied voltage required for water splitting can be calculated based on the corresponding Nernst equations:

**For water electrolysis in the alkaline-acid electrolyzer:**

**HER at the cathode (pH = 0):**

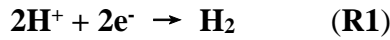

$$E_{HER} = E_{\text{H}^+/\text{H}_2}^\theta - 2.303 \frac{RT}{2F} \log \left[ \frac{\alpha_{\text{H}_2}}{(\alpha_{\text{H}^+})^2} \right] = 0 \text{ V} - 0.0591 * \text{pH}_{\text{cathode}} = 0$$

$$(E_{\text{H}^+/\text{H}_2}^\theta = 0 \text{ V vs. RHE}) \quad (\text{Eq.1})$$

**OER at the anode (pH = 14):**

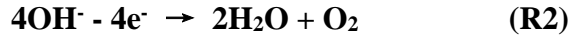

$$E_{OER} = E_{\text{O}_2/\text{OH}^-}^\theta - 2.303 \frac{RT}{4F} \log \left[ \frac{(\alpha_{\text{OH}^-})^4}{(\alpha_{\text{H}_2\text{O}})^2(\alpha_{\text{O}_2})} \right] = 1.23 \text{ V} - 0.0591 * \text{pH}_{\text{anode}} = 0.402$$

$$(E_{\text{O}_2/\text{OH}^-}^\theta = 1.23 \text{ V vs. RHE}) \quad (\text{Eq.2})$$

**The overall reaction for water splitting:**

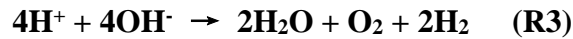

$$V_{\text{theoretical required}} = E_{\text{O}_2/\text{OH}^-}^\theta - E_{\text{H}^+/\text{H}_2}^\theta - 2.303 \frac{RT}{4F} \log \left[ \frac{(\alpha_{\text{H}_2\text{O}})^2(\alpha_{\text{O}_2})(\alpha_{\text{H}_2})^2}{(\alpha_{\text{H}^+})^4(\alpha_{\text{OH}^-})^4} \right]$$

$$= 1.23 - 0.0591 * (\text{pH}_{\text{anode}} - \text{pH}_{\text{cathode}}) = \mathbf{0.402} \quad (\text{Eq.3})$$

In these Equations, F is the Faraday constant, 96 485 C mol<sup>-1</sup>, T is the room temperature (commonly 298.15 K), R is the gas constant (8.314 J mol<sup>-1</sup> K<sup>-1</sup>),  $pH_{anode} - pH_{cathode}$  is the pH difference ( $\Delta pH$ ) of the anolyte and catholyte, and the  $2.303 \frac{RT}{F} * \Delta pH$  is equal to the electrochemical neutralization energy deriving from the reaction of hydroxide ion and proton combining to water, which provides an additional energy or voltage for water splitting as presented in **R4**:

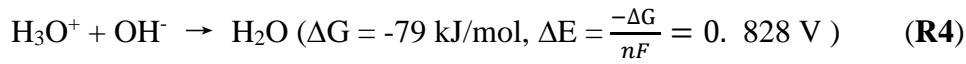

Such asymmetric-electrolyte electrolyte with HER in 0.5 M H<sub>2</sub>SO<sub>4</sub> (pH = 0) at cathode and OER in 1.0 M KOH (pH = 14) at anode can be also regarded to form a pH-gradient concentration cell, and a cell voltage of 0.828 V will be produced

**For water electrolysis in the alkaline-acid electrolyzer with HzOR replacing OER:**

**HER at the cathode (pH = 0):**

**The same as R1**

**HzOR at the anode (pH = 14):**

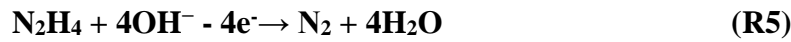

$$E_{HzOR} = E_{HzOR}^\theta - 2.303 \frac{RT}{4F} \log \left[ \frac{(\alpha_{N_2H_4})(\alpha_{OH^-})^4}{(\alpha_{N_2})(\alpha_{H_2O})^4} \right] = -0.33 \text{ V} - 0.0591 * pH = -1.158$$

$$(E_{UOR}^\theta = -0.33 \text{ V vs. RHE}) \quad (\mathbf{Eq.4})$$

**The overall reaction:**

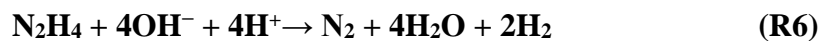

$V_{Theory}$  required or open circuit

$$= E_{HzOR}^\theta - E_{H^+/H_2}^\theta - 2.303 \frac{RT}{4F} \log \left[ \frac{(\alpha_{H_2O})^4 (\alpha_{N_2}) (\alpha_{H_2})^2}{(\alpha_{N_2H_4}) (\alpha_{H^+})^4 (\alpha_{OH^-})^4} \right]$$

$$= -0.33 - 0.059 * (pH_{anode} - pH_{cathode}) = -1.158 \quad (\text{Eq.5})$$

Therefore, combined the electrochemical neutralization energy and HzOR, spontaneous H<sub>2</sub> production and power supply can be achieved simultaneously in the electrochemical system, forming an alkaline-acidic hydrazine fuel cell with theoretical overall cell voltage of 1.158 V (0.828 V + (0-(-0.33)) V = 1.158 V).

In such asymmetric-electrolyte device, a bipolar membrane should be employed to prevent the mixture of acid in cathode and alkaline in anode that leads to chemical neutralization. The bipolar membrane is a double-layer membrane that consists of an anion exchanger layer on the cathode side blocking transport of cation and a cation exchanger layer on the anode side of the cell blocking transport of anion, and the K<sup>+</sup> cations are transported to cation exchange layer while SO<sub>4</sub><sup>2-</sup> anions are transported to anion exchange layer.

## 2. Production quantification analysis

The produced H<sub>2</sub> in the cathode and N<sub>2</sub> in the anode were collected by drainage method, and the produced H<sub>2</sub> was analyzed by the gas chromatograph equipped with a thermal conductivity detector (TCD). The Faradaic Efficiency calculation formula is expressed as in **Eq.6**,

$$EF = \frac{\alpha n F}{Q} \quad (\text{Eq.6})$$

in which  $\alpha$  denotes the numbers of transferred electrons (*e.g.*  $\alpha = 2$  for H<sub>2</sub>),  $n$  denotes the number of moles of the obtained products,  $F$  is the faradaic constant, 96 485 C mol<sup>-1</sup>, and  $Q$  denotes the whole passed charge. H<sub>2</sub> and N<sub>2</sub> was collected during the chronopotentiometry experiment conducted at 10 mA cm<sup>-2</sup> in the homemade cell with

gas collection setup (Figure S13) separated by a bipolar membrane with Ni<sub>0.5</sub>Co<sub>0.5</sub>Se<sub>2</sub>/CC as the bifunctional electrodes in 1 M KOH and 0.5 M H<sub>2</sub>SO<sub>4</sub>, respectively. Before testing, Ar was introduced in the two chambers for 30 min and then the cell was sealed. The time were recorded every produced 0.5 mL H<sub>2</sub> in the cathode at room temperature (25 °C) and the specific data was presented in Table S5. The total charge Q could be obtained from the applied current and the operating time, namely, Q = I\* t, while n could be obtained by the volum of obtained H<sub>2</sub> (V), *i.e.*, n = V/24.5, (24.5 L mol<sup>-1</sup> is the gas constant at 25 °C), and the volume can be qualitatively determined by the GC analysis. The actual equation can be expressed as following:

$$EF = \frac{\alpha VF}{It*24.5} \quad (\mathbf{Eq. 7})$$

Besides, the H<sub>2</sub> evolution rate (r(H<sub>2</sub>), Table S5) was also evaluated based on the equation 8:

$$r(\text{H}_2) = \frac{V}{24.5t} \quad (\mathbf{Eq. 8})$$

### 3. Theoretical Calculation Details

#### (1) DFT details

Spin-polarized DFT calculations were performed with periodic super-cells under the generalized gradient approximation (GGA) using the Perdew-Burke-Ernzerhof (PBE) functional for exchange-correlation and the ultrasoft pseudopotentials for nuclei and core electrons. The Kohn-Sham orbitals were expanded in a plane-wave basis set with a kinetic energy cutoff of 30 Ry and the charge-density cutoff of 300 Ry. The Fermi-surface effects has been treated by the smearing technique of Methfessel and Paxton, using a smearing parameter of 0.02 Ry. 210 surfaces are cleaved in modeling NiSe<sub>2</sub>, CoSe<sub>2</sub> and Co<sub>0.5</sub>Ni<sub>0.5</sub>Se<sub>2</sub>. The Periodically repeated three layer slab models with 1 x 1 supercell are introduced, while the topmost layer is allowed to relax during the structure optimization until the Cartesian force components acting on each atom were below 10<sup>-3</sup> Ry/Bohr and the total energy converged to within 10<sup>-5</sup> Ry. The Brillouin-zones were sampled with a 3×2×1 k-point mesh. The PWSCF codes contained in the Quantum ESPRESSO distribution<sup>1</sup> were used to implement the calculations.

#### (2) Reaction model.

The total reaction function of basic UzOR is

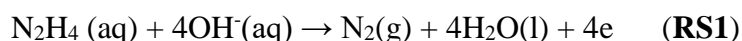

which contains a 4 electrons transfer. The equilibrium potential of RS1 is -0.33 V.

Here, for the difficulties in directly modelling N<sub>2</sub>H<sub>4</sub> (aq), its Gibbs free energy is deduced by the DFT based free energy of N<sub>2</sub>(g), H<sub>2</sub>O(l) and OH<sup>-</sup>(aq) in utilizing the

condition that RS1 is in equilibrium on -0.33 V. The free energies of H<sub>2</sub>O(l) and OH<sup>-</sup>(aq) are calculated through the equilibrium of OH<sup>-</sup>+1/2H<sub>2</sub>(g)→H<sub>2</sub>O(l)+e (basic hydrogen oxidation reaction) under  $U_{\text{RHE}}=0$  V, where we have:

$$G^0[\text{H}_2\text{O}(\text{l})]-G^0[\text{OH}^-(\text{aq})]=G^0[\text{H}_2(\text{g})] \quad (\text{S1})$$

$G^0[\text{H}_2\text{O}(\text{l})]$ ,  $G^0[\text{OH}^-(\text{aq})]$  and  $G^0[\text{H}_2(\text{g})]$  are the standard formation Gibbs free energies of H<sub>2</sub>O(l), OH<sup>-</sup>(aq) and H<sub>2</sub>(g). Eq.S1 tells that we can calculate  $G^0[\text{H}_2(\text{g})]$  in avoid of calculating the  $G^0[\text{H}_2\text{O}(\text{l})]$  and  $G^0[\text{OH}^-(\text{aq})]$ .

Afterwards, on references of the calculations done by Zhou *et al*<sup>2</sup>, HzOR follows a consequent deprotonation pathway:

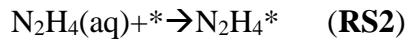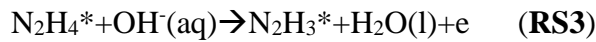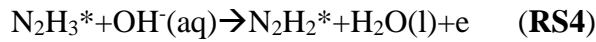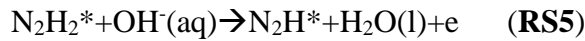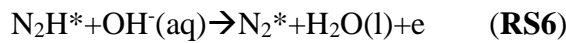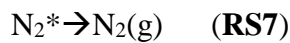

For each reaction, where the Gibbs free energy of adsorbates are calculated by the  $G_{\text{A}^*}=G_{\text{A}^*+\text{slab}}-G_{\text{slab}}+\text{ZPE}_{\text{A}^*}$ .  $\text{ZPE}_{\text{A}^*}$  stands for the zero point energy (ZPE) of adsorbate A\*. The entropy terms are ignored for entropies are usually considered to be zero during the adsorption.

(3) Entropy and zero point energies

(4) Chosen of the active site

As indicated on Figure S16a,c,e, the Ni<sub>x</sub>Co<sub>1-x</sub>Se<sub>2</sub> surfaces contain several possible



sites for adsorption. In order to choose the most active sites, the PDOS of all the possible active sites are calculated and depicted on Figure S16b,d,f. Figure S16b,d,f all indicate the sites with highest d states are site 3 and 4. Actually, site 3 and 4 are equivalent sites among the three surfaces. So site 3 are chosen as the active sites when calculating the reaction FEDs.

## 5. Figures

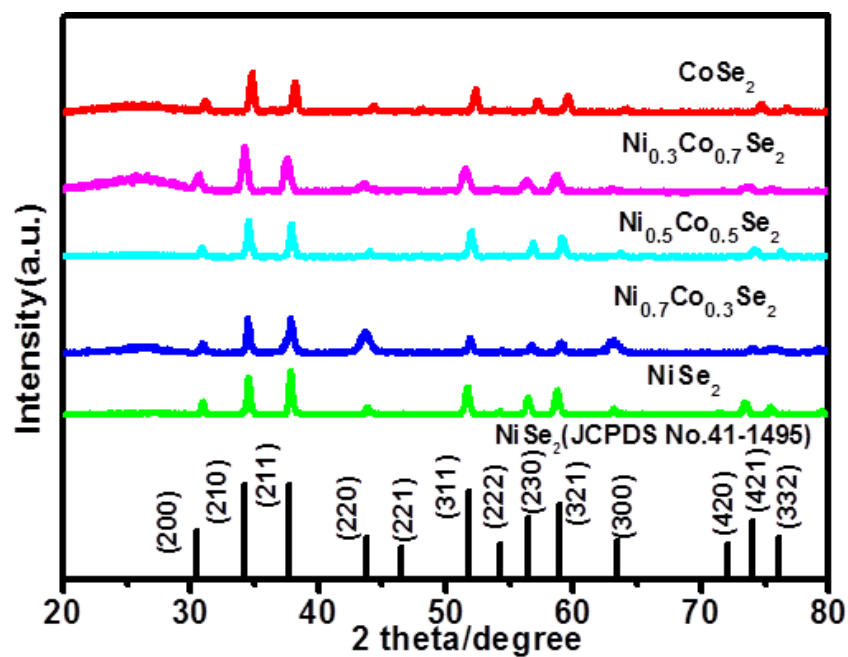

**Figure S1.** XRD patterns for  $\text{Ni}_{0.5}\text{Co}_{0.5}\text{Se}_2/\text{CC}$ ,  $\text{Ni}_{0.3}\text{Co}_{0.7}\text{Se}_2/\text{CC}$ ,  $\text{Ni}_{0.7}\text{Co}_{0.3}\text{Se}_2/\text{CC}$ ,  $\text{CoSe}_2/\text{CC}$  and  $\text{NiSe}_2/\text{CC}$

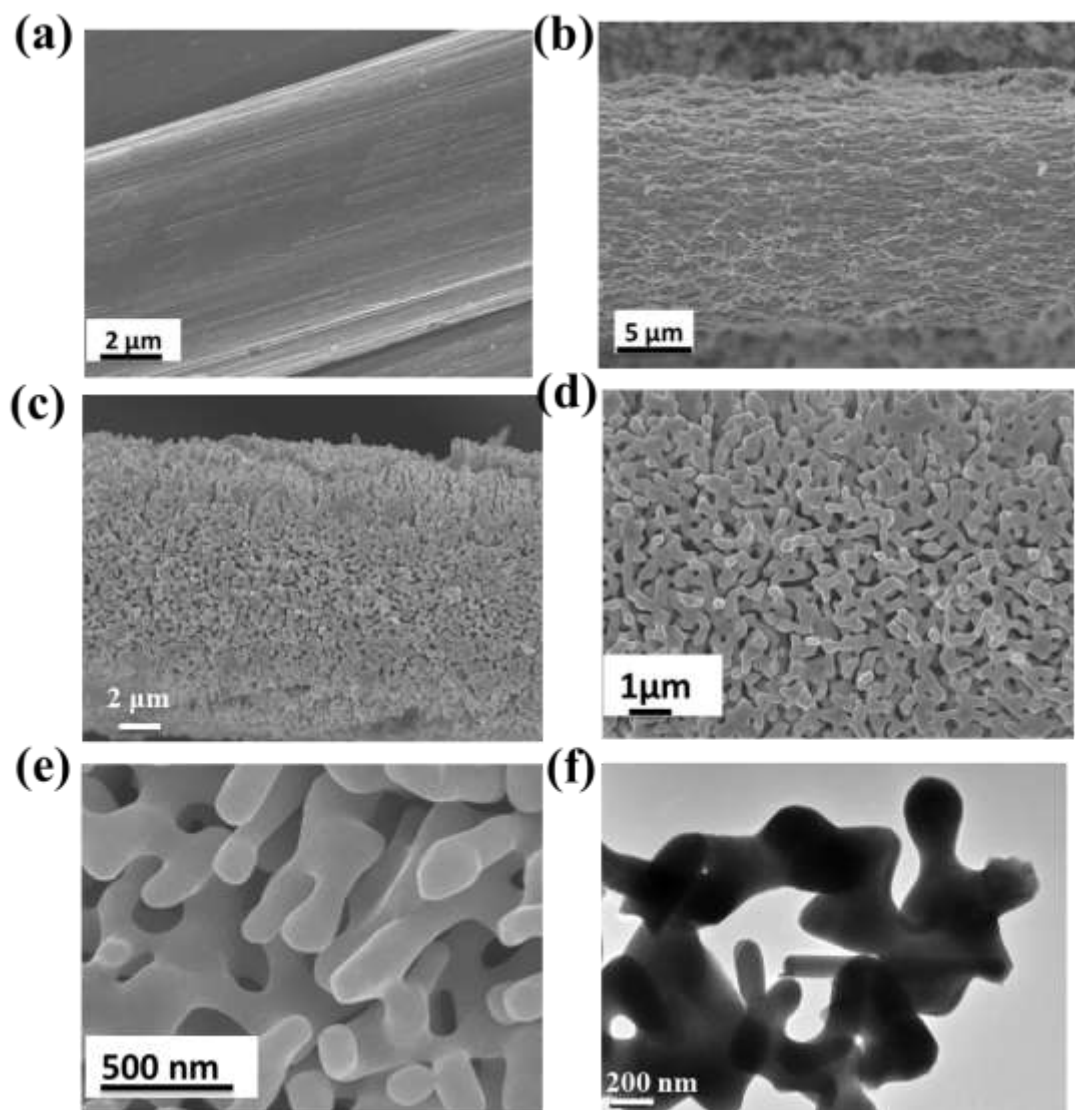

**Figure S2.** SEM images for the CC (a), Ni<sub>0.5</sub>Co<sub>0.5</sub>(OH)<sub>2</sub>/CC (b-c) and its corresponding selenization Ni<sub>0.5</sub>Co<sub>0.5</sub>Se<sub>2</sub>/CC (d-e); TEM image for Ni<sub>0.5</sub>Co<sub>0.5</sub>Se<sub>2</sub>/CC (f).

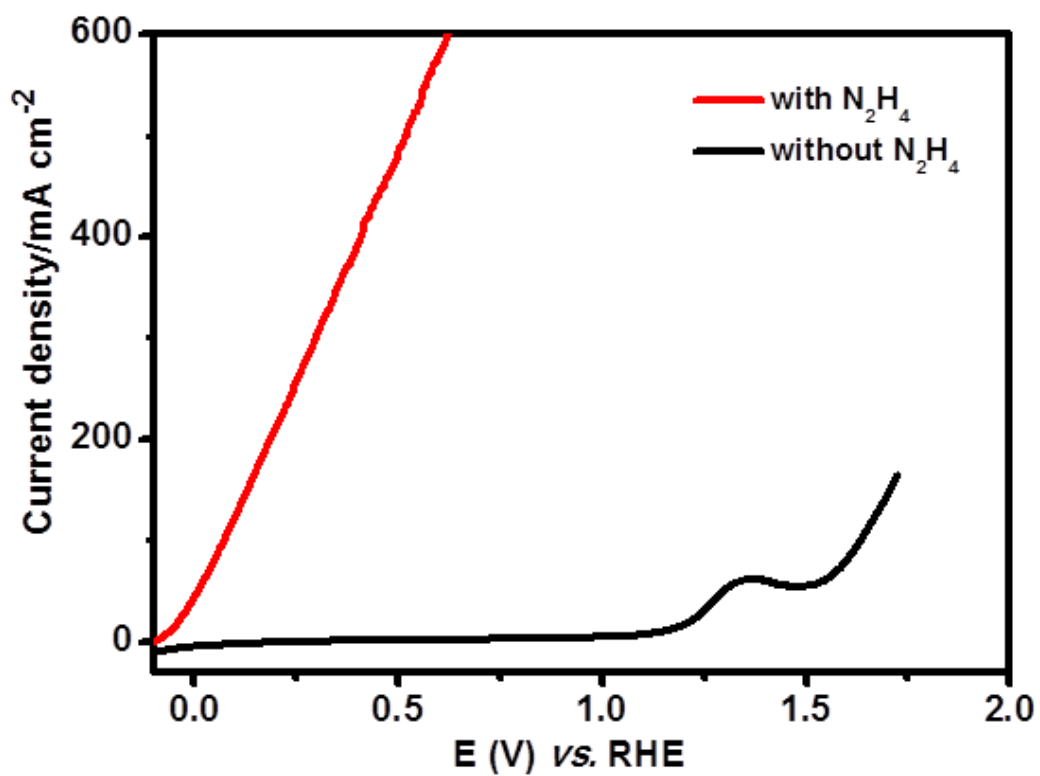

**Figure S3.** (a) Linear sweep voltammetry (LSV) curves of the representative Ni<sub>0.5</sub>Co<sub>0.5</sub>Se<sub>2</sub>/CC for HzOR and OER in 1.0 M KOH

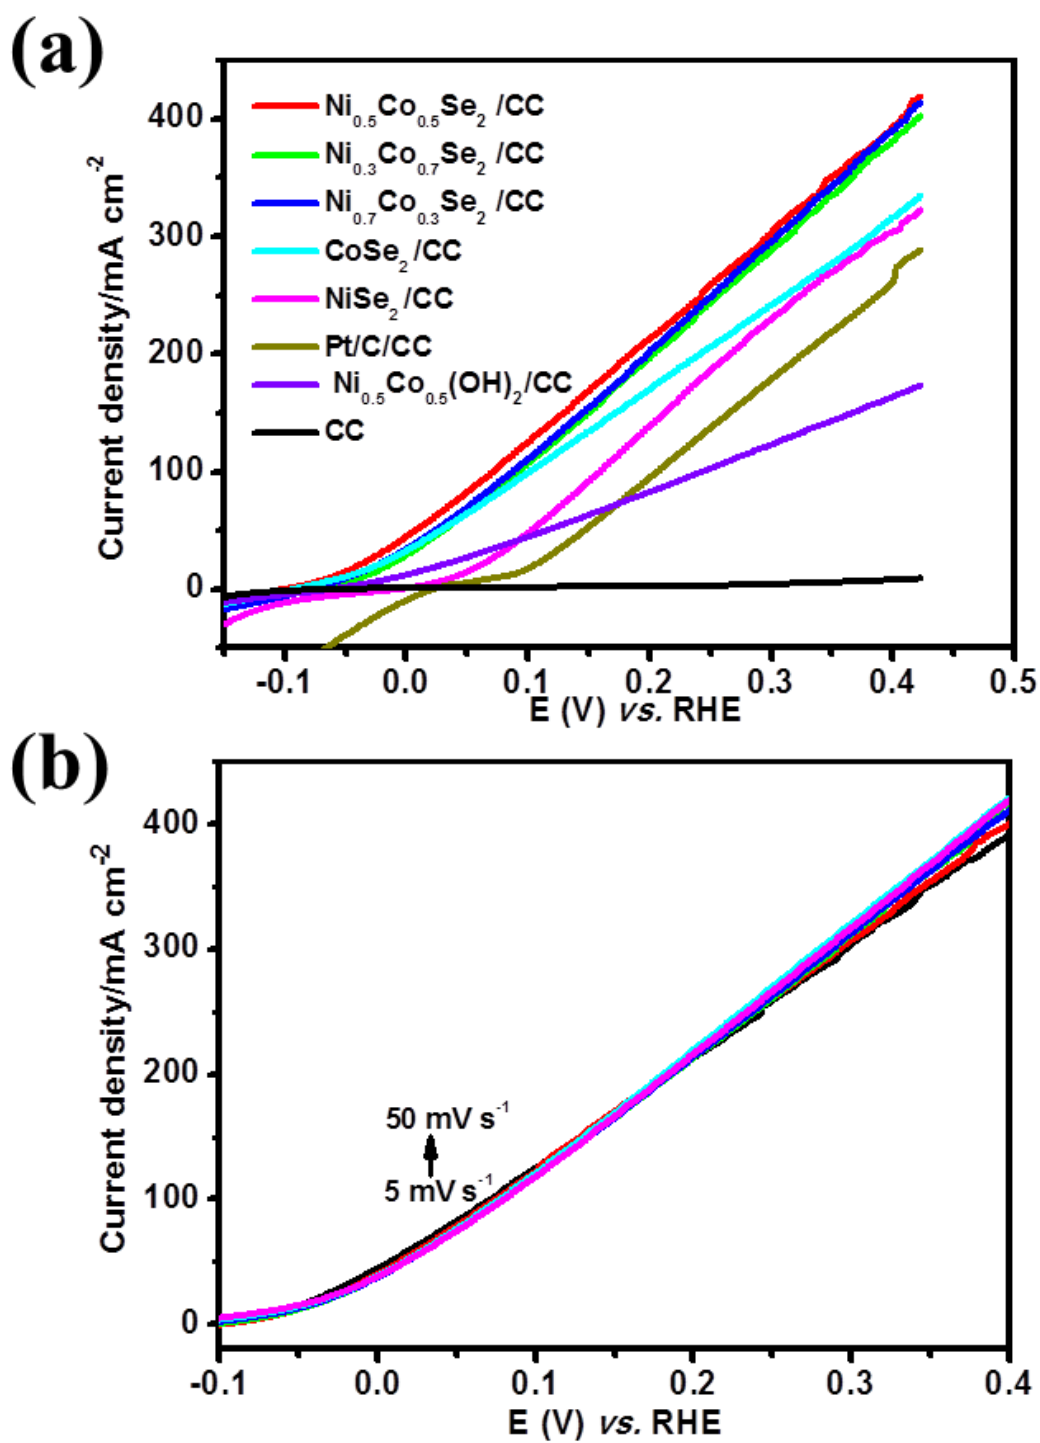

**Figure S4.** (a) LSV curves in 1 M KOH in presence of 0.5 M  $\text{N}_2\text{H}_4$  at a scan rate of  $5 \text{ mV s}^{-1}$ ; (b) LSV curves of  $\text{Ni}_{0.5}\text{Co}_{0.5}\text{Se}_2/\text{CC}$  electrode in 1 M KOH with 0.5 M hydrazine at different scan

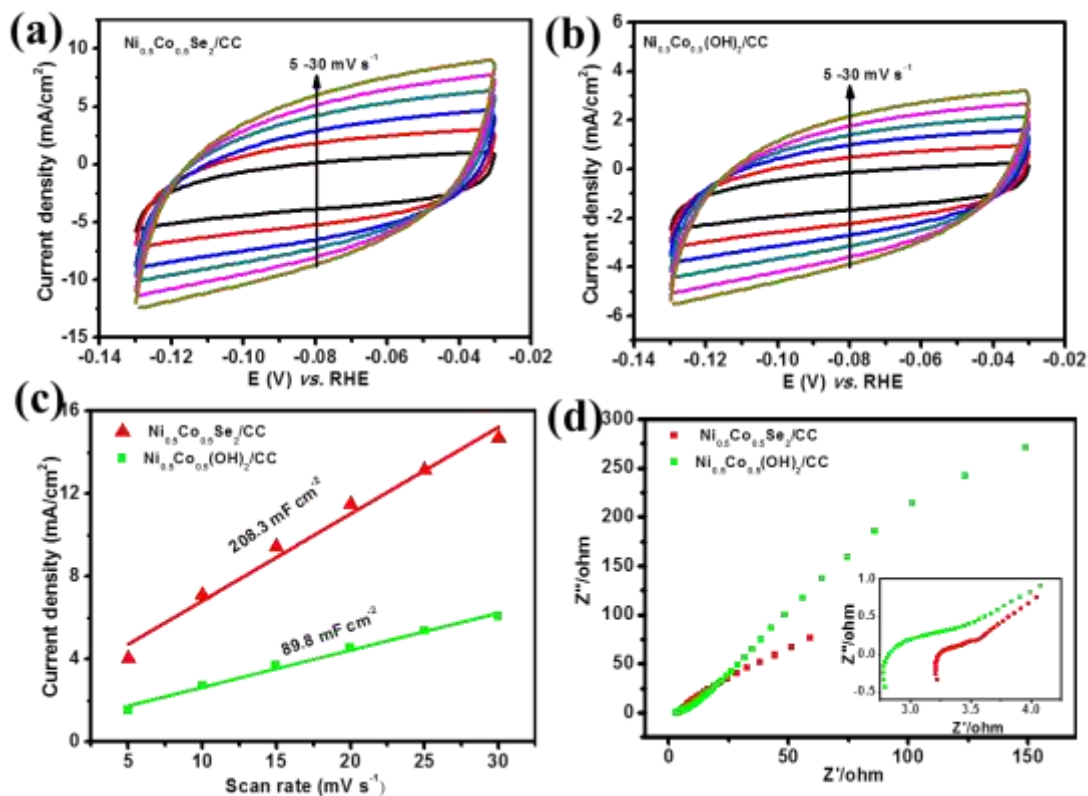

**Figure S5.** Electrochemical capacitance measurements for the estimation of the electrochemical active surface area of catalysts in 1.0 M KOH; Cyclic voltammograms of the  $\text{Ni}_{0.5}\text{Co}_{0.5}\text{Se}_2/\text{CC}$  (a) and  $\text{Ni}_{0.5}\text{Co}_{0.5}(\text{OH})_2/\text{CC}$  (b) with scan rates ranging from 5  $\text{mV s}^{-1}$  to 30  $\text{mV s}^{-1}$  with an interval point of 5  $\text{mV s}^{-1}$ , the scanning potential range is from -0.13 V to 0.03 V vs. RHE; the extraction of the double-layer capacitances of  $\text{Ni}_{0.5}\text{Co}_{0.5}\text{Se}_2/\text{CC}$  and  $\text{Ni}_{0.5}\text{Co}_{0.5}(\text{OH})_2/\text{CC}$ , the  $C_{dl}$  was estimated by plotting  $j_a - j_c$  at  $-0.08$  V (where  $j_c$  and  $j_a$  are the cathodic and anodic current densities, respectively) vs. RHE against the scan rate, where the slope was twice that of  $C_{dl}$ . (c); Nyquist plots for  $\text{Ni}_{0.5}\text{Co}_{0.5}\text{Se}_2/\text{CC}$  and  $\text{Ni}_{0.5}\text{Co}_{0.5}(\text{OH})_2/\text{CC}$  in frequency range of 0.01-  $10^5$  Hz (d)

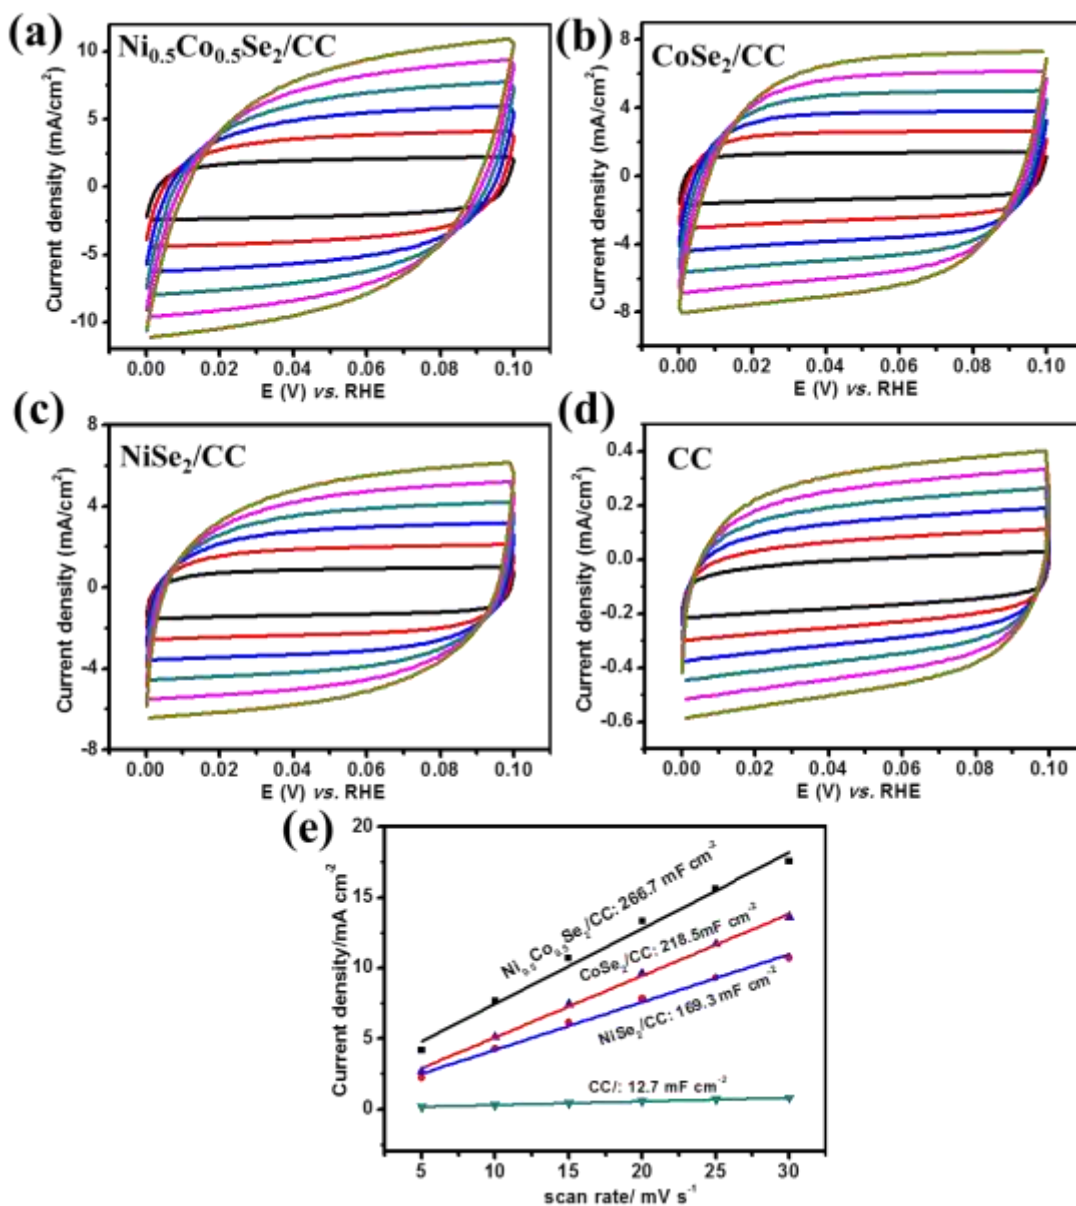

**Figure S6.** Electrochemical capacitance measurements for the estimation of the electrochemical active surface area of catalysts in 0.5 M H<sub>2</sub>SO<sub>4</sub>; Cyclic voltammograms of the Ni<sub>0.5</sub>Co<sub>0.5</sub>Se<sub>2</sub>/CC (a), CoSe<sub>2</sub> (b), NiSe<sub>2</sub> (c) and CC (d) with scan rates ranging from 5 mV s<sup>-1</sup> to 30 mV s<sup>-1</sup> with an interval point of 5 mV s<sup>-1</sup>, the scanning potential range is from 0 V to 0.1 V vs. RHE; the extraction of the double-layer capacitances of Ni<sub>0.5</sub>Co<sub>0.5</sub>Se<sub>2</sub>/CC, CoSe<sub>2</sub>, NiSe<sub>2</sub> and CC, the C<sub>dl</sub> was estimated by plotting  $j_a - j_c$  at 0.05 V (where  $j_c$  and  $j_a$  are the cathodic and anodic current densities, respectively) vs. RHE against the scan rate, where the slope was twice that of C<sub>dl</sub> (e)

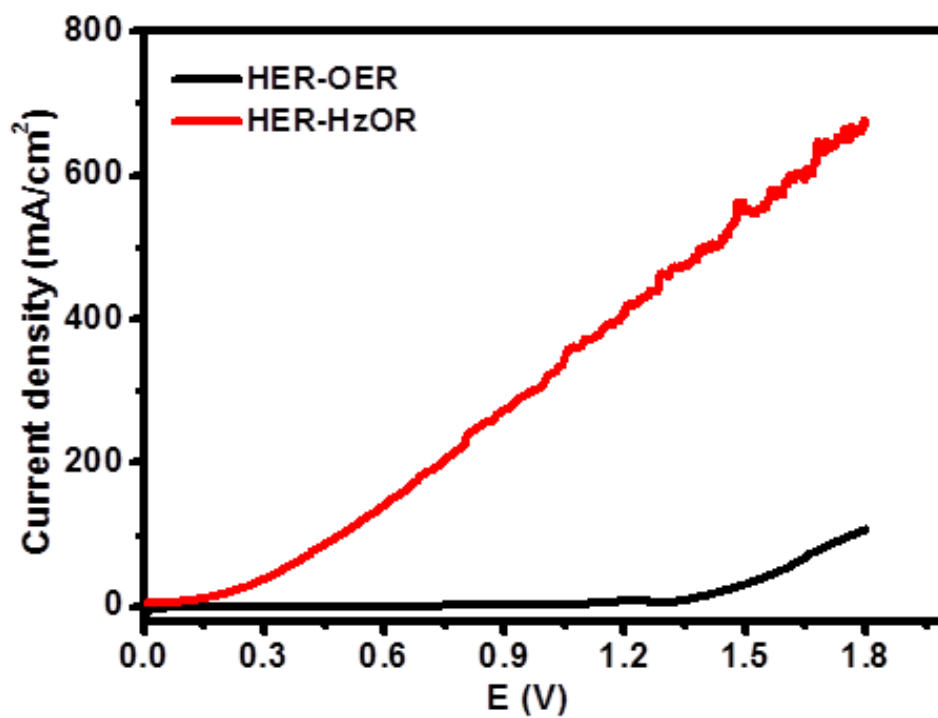

**Figure S7.** LSV curves of two-electrode system with  $\text{Ni}_{0.5}\text{Co}_{0.5}\text{Se}_2/\text{CC}$  as the bifunctional catalysts in 1.0 M KOH electrolyte



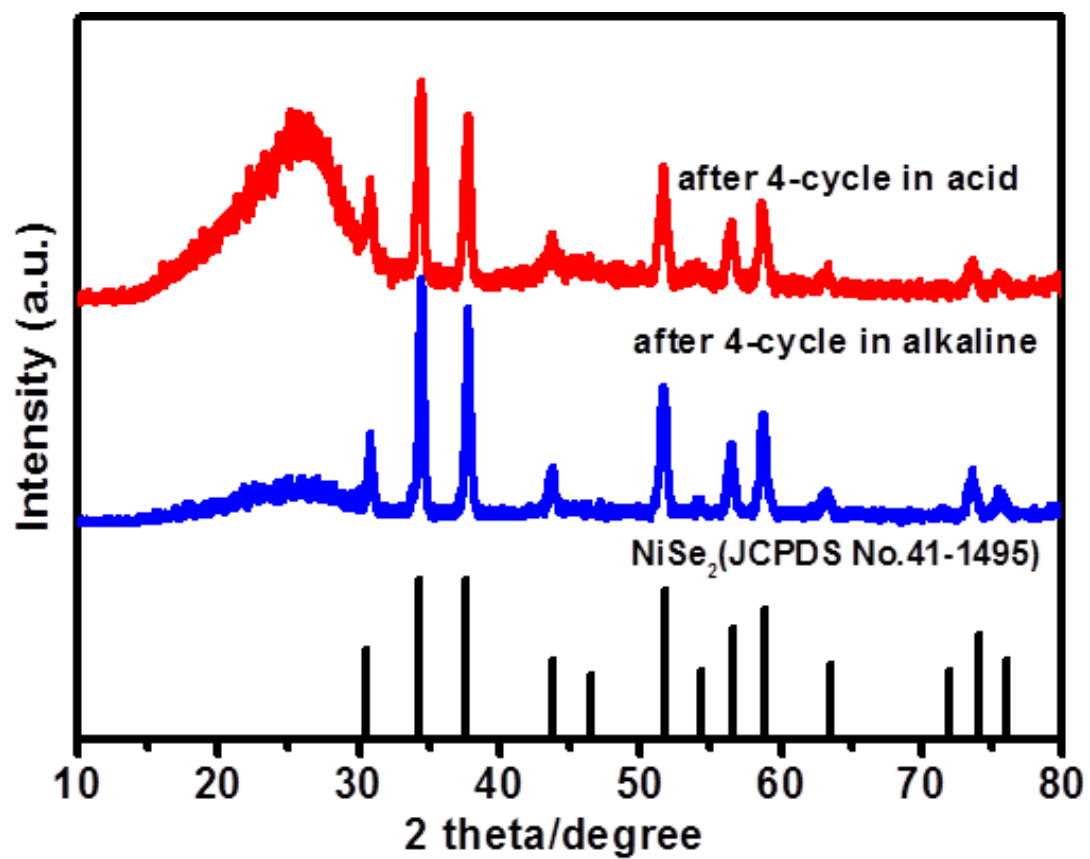

**Figure S8.** XRD of Ni<sub>0.5</sub>Co<sub>0.5</sub>Se<sub>2</sub>/CC after 105 h in acid and in alkaline, respectively

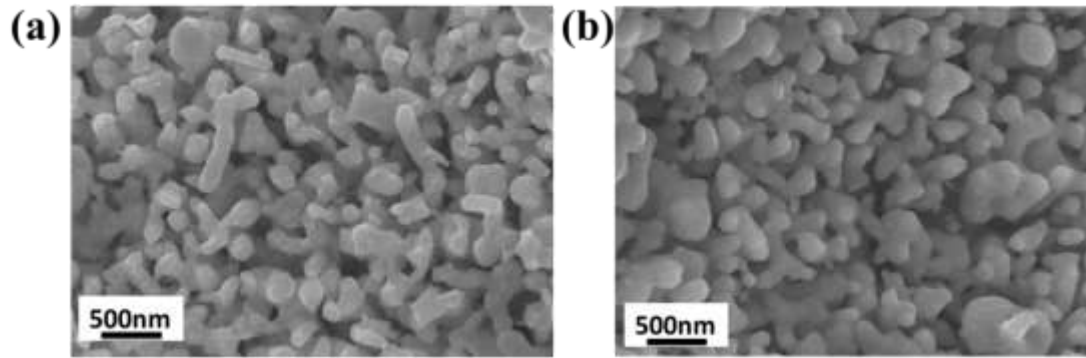

**Figure S9.** SEM images of Ni<sub>0.5</sub>Co<sub>0.5</sub>Se<sub>2</sub>/CC after HER in acid (a) and HzOR (b) in alkaline, respectively

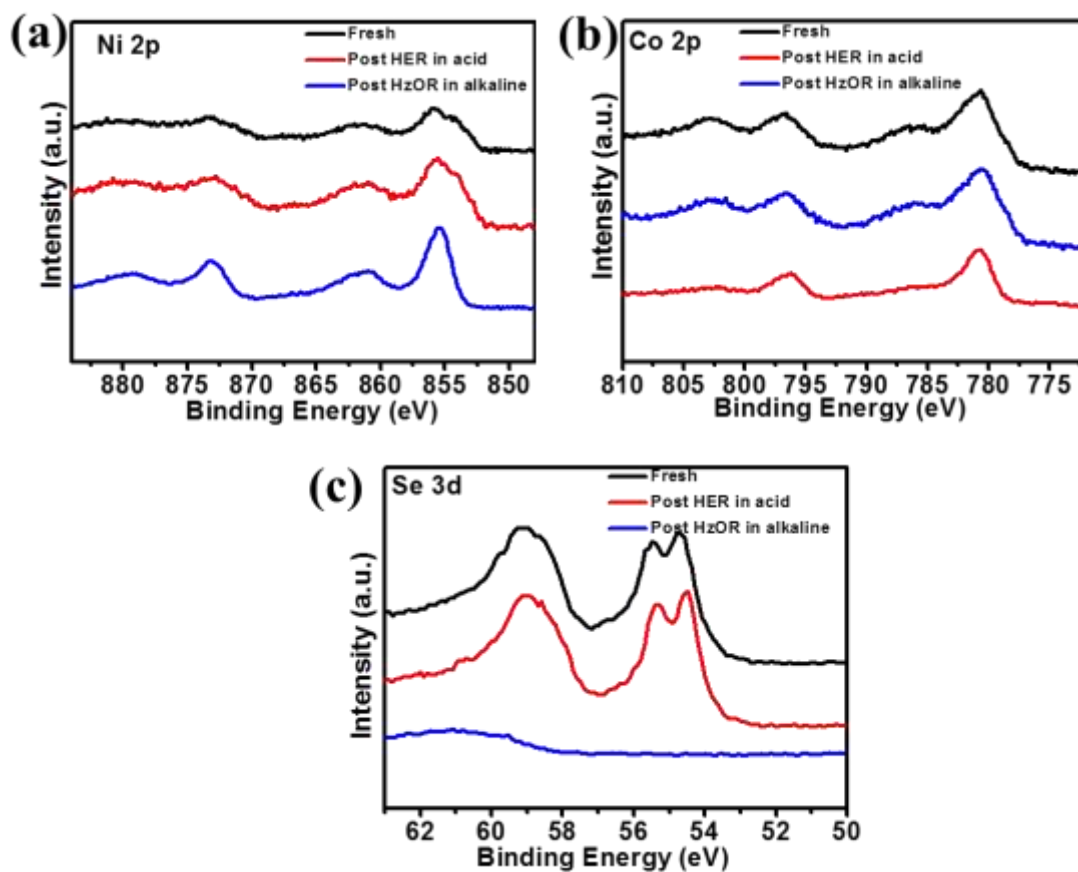

**Figure S10.** Comparison of high-resolution XPS spectra of (a) Ni 2p, (b) Co 2p, (c) Se 3d for the fresh, post-HER and post-HzOR  $\text{Ni}_{0.5}\text{Co}_{0.5}\text{Se}_2/\text{CC}$  samples.

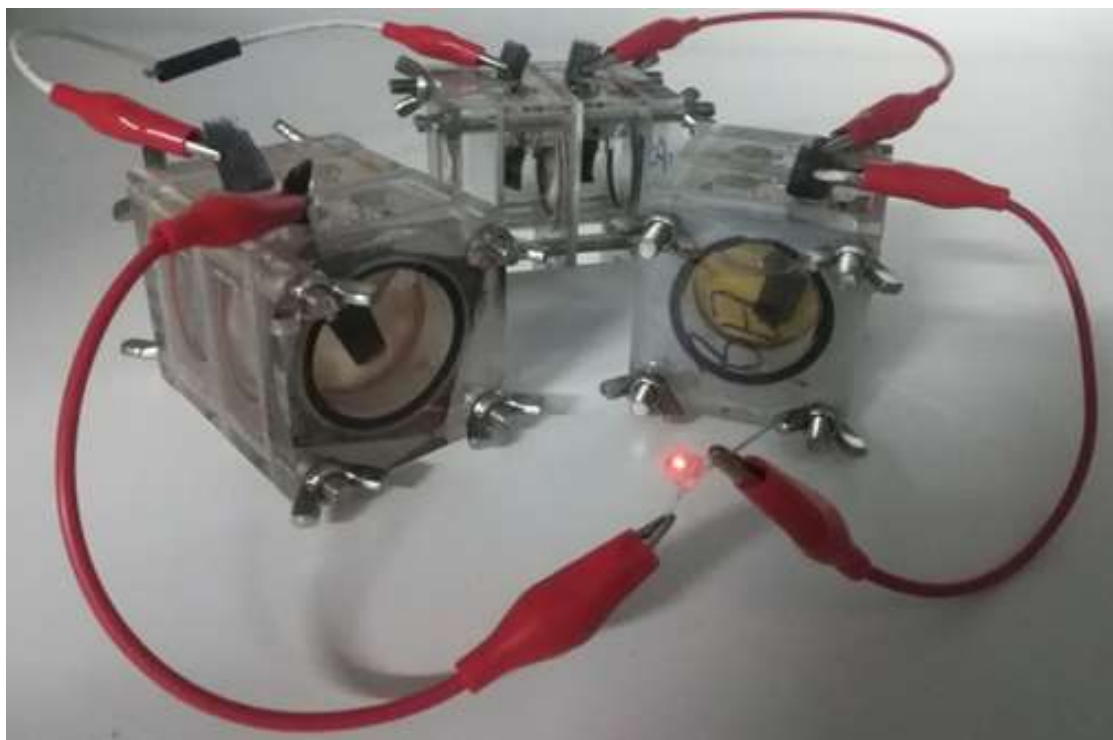

**Figure S11.** Photograph of a red LED (about 1.8-2.2 V) powered by three HzOR-HER asymmetric-electrolyte cell with  $\text{Ni}_{0.5}\text{Co}_{0.5}\text{Se}_2$  as the electrodes

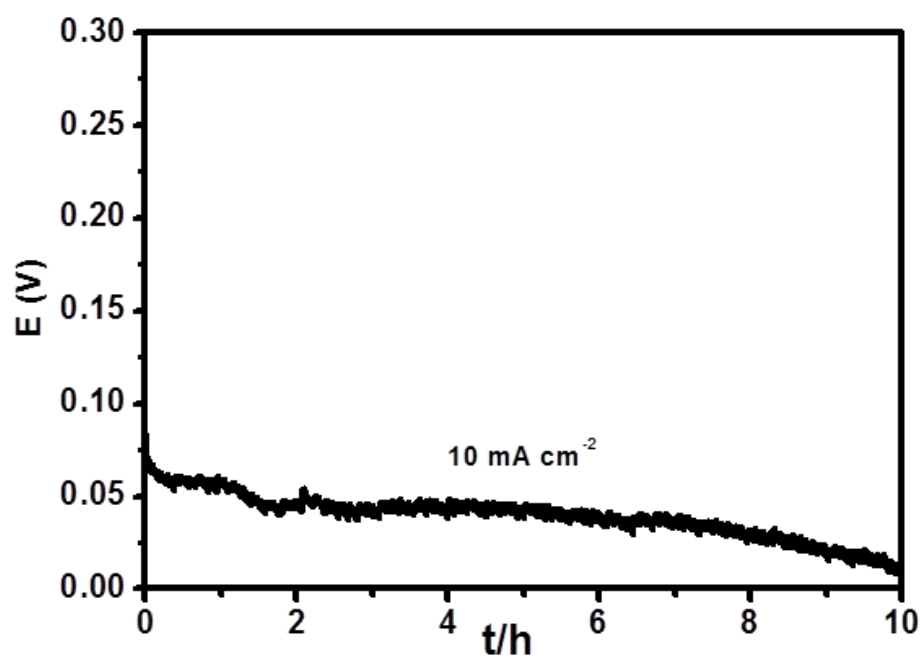

**Figure S12.** The asymmetric-electrolyte hydrazine fuel cell discharging at constant-current of 10 mA cm<sup>-2</sup>

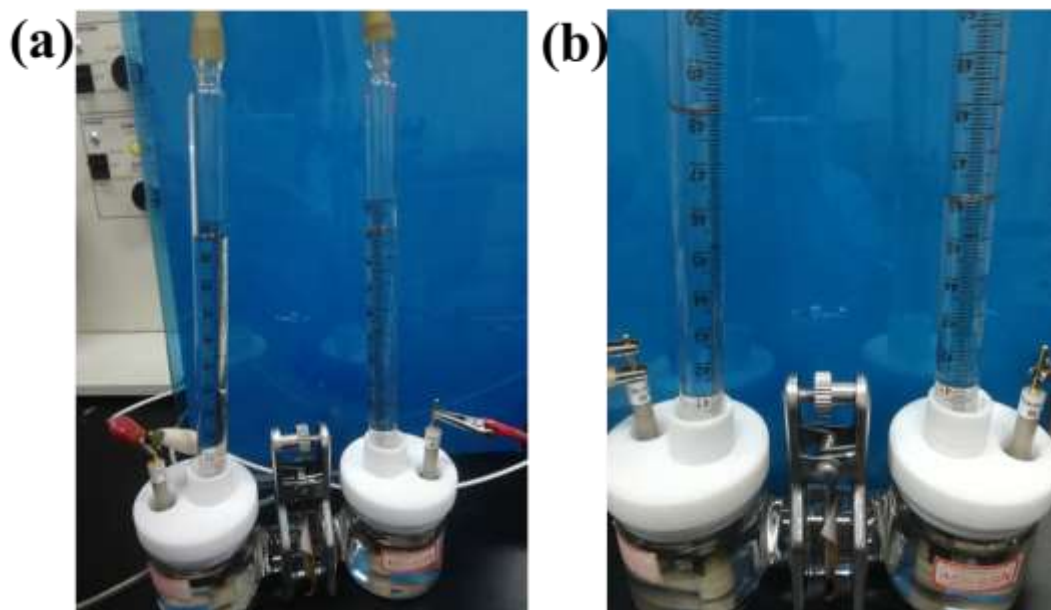

**Figure S13.** The device for measuring H<sub>2</sub> Faradaic Efficiency

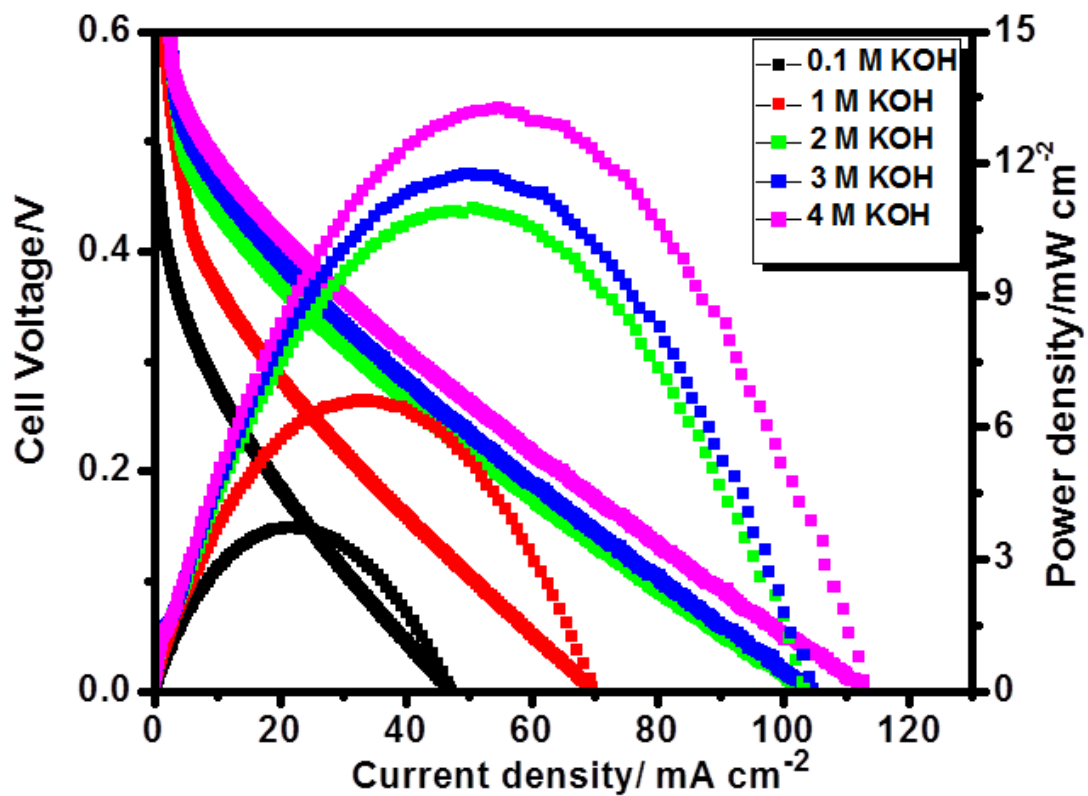

**Figure S14.** Cell performance plots with different KOH concentration in anode and 0.5 M  $\text{H}_2\text{SO}_4$  in cathode with  $\text{Ni}_{0.5}\text{Co}_{0.5}\text{Se}_2/\text{CC}$  as both the anode and cathode at room temperature;

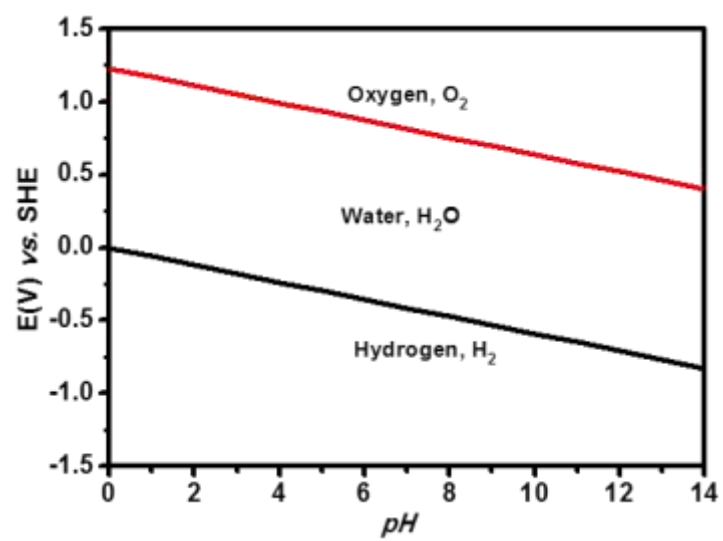

**Figure S15.** A pourbaix daigram of water with curves obtained by the Nernst equation (Equations 1 and 2)



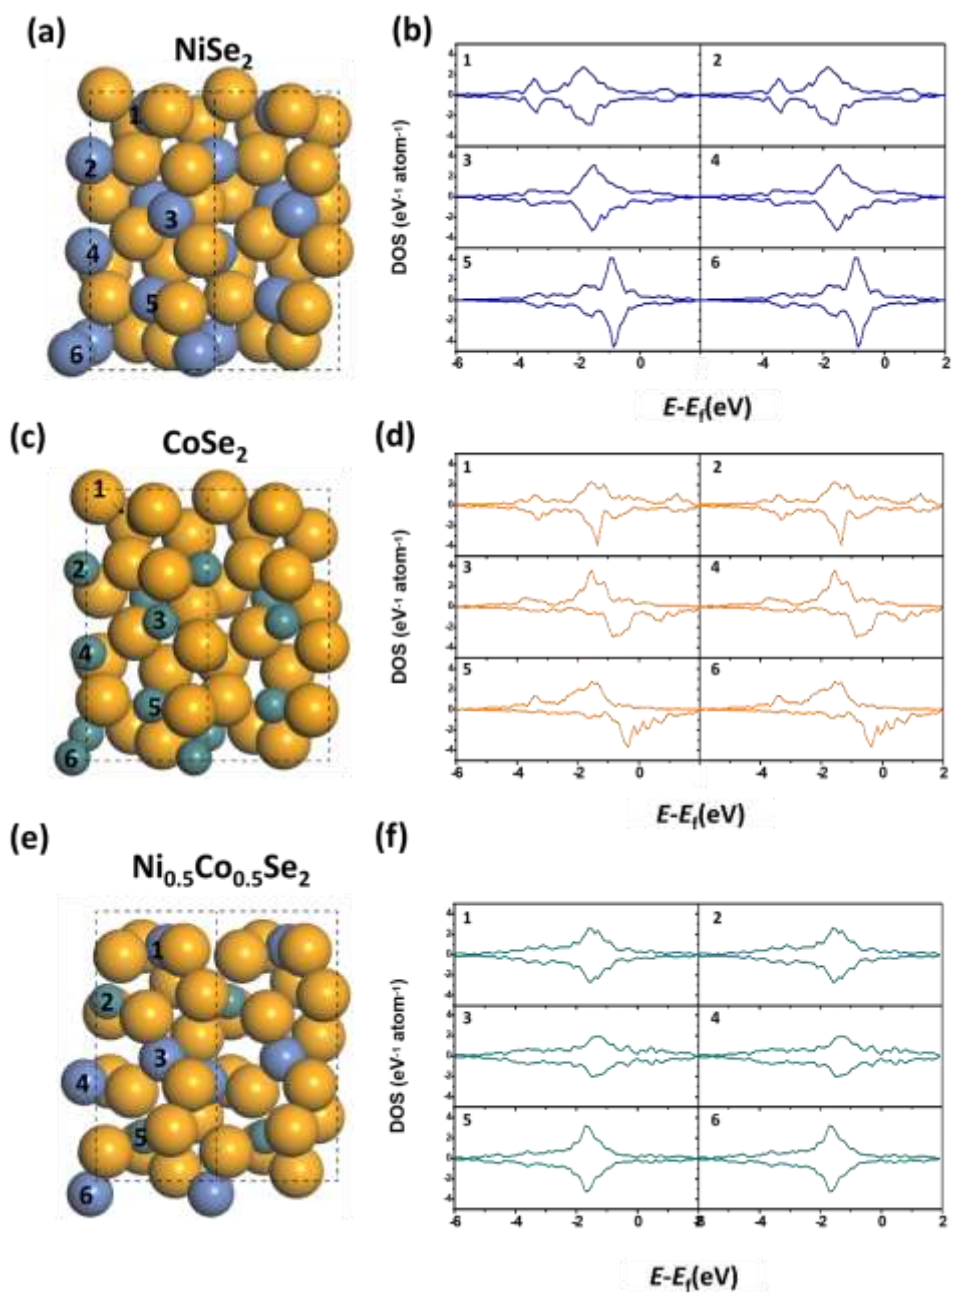

**Figure S16.** (a, c, d) the top views of the DFT optimized surfaces, where the associated numbers are the possible active sites. (b, d, f) The associated PDOS of these sites. The numbers give the site numbers.

## 5. Tables

**Table S1.** Comparison of electrochemical parameters for traditional hydrazine fuel cell, water electrolysis, hydrazine oxidation assisted water electrolysis, and the hydrogen production hydrazine fuel cell

| Reactions                                                                              | Input or output voltage (V) | Gibbs Free Energy (KJ mol <sup>-1</sup> ) | H <sub>2</sub> production (mol) | References |
|----------------------------------------------------------------------------------------|-----------------------------|-------------------------------------------|---------------------------------|------------|
| $\text{N}_2\text{H}_4 + \text{O}_2 \rightarrow \text{N}_2 + 2\text{H}_2\text{O}$       | 1.56 (output)               | -602.07                                   | 0                               | 3          |
| $\text{H}_2\text{O} \rightarrow \text{O}_2 + 2\text{H}_2$                              | 1.23 (input)                | 474.70                                    | 2                               | 4          |
| $\text{N}_2\text{H}_4 \rightarrow \text{N}_2 + 2\text{H}_2$                            | 0.33(output)                | -127.36                                   | 2                               | 5          |
| $\text{N}_2\text{H}_4 + \text{H}^+ + \text{OH}^- \rightarrow \text{N}_2 + 2\text{H}_2$ | 1.16 (output)               | -447.69                                   | 2                               | This work  |

**Table S2.** Elemental compositions of the products obtained by ICP<sup>a</sup>

| Ni/Co<br>feed ratio | Ni/Co ratio in<br>$\text{Ni}_{1-x}\text{Co}_x(\text{OH})_2$                                         | Ni/Co ratio in<br>$\text{Ni}_{1-x}\text{Co}_x\text{Se}_2$                                       |
|---------------------|-----------------------------------------------------------------------------------------------------|-------------------------------------------------------------------------------------------------|
| 1/1                 | $\text{Ni}_{0.47}\text{Co}_{0.53}(\text{OH})_2$<br>Or $\text{Ni}_{0.5}\text{Co}_{0.5}(\text{OH})_2$ | $\text{Ni}_{0.55}\text{Co}_{0.45}\text{Se}_2$<br>Or $\text{Ni}_{0.5}\text{Co}_{0.5}\text{Se}_2$ |
| 1/2                 | $\text{Ni}_{0.26}\text{Co}_{0.74}(\text{OH})_2$<br>Or $\text{Ni}_{0.3}\text{Co}_{0.7}(\text{OH})_2$ | $\text{Ni}_{0.31}\text{Co}_{0.69}\text{Se}_2$<br>Or $\text{Ni}_{0.3}\text{Co}_{0.7}\text{Se}_2$ |
| 2/1                 | $\text{Ni}_{0.67}\text{Co}_{0.33}(\text{OH})_2$<br>Or $\text{Ni}_{0.7}\text{Co}_{0.3}(\text{OH})_2$ | $\text{Ni}_{0.68}\text{Co}_{0.32}\text{Se}_2$<br>Or $\text{Ni}_{0.7}\text{Co}_{0.3}\text{Se}_2$ |

<sup>a</sup> The error in the ICP measurement was 5%

**Table S3.** Comparison of HzOR performance for these selenides in this work with other catalysts under alkaline conditions

| Catalysts                                               | Electrolytes                                      | E (50 mA cm <sup>-2</sup> )/mV vs.<br>RHE | References |
|---------------------------------------------------------|---------------------------------------------------|-------------------------------------------|------------|
| Ni <sub>2</sub> P/NF                                    | 1.0 M KOH + 0.5 M N <sub>2</sub> H <sub>4</sub>   | -25                                       | 5          |
| Cu film/CF                                              | 3.0 M NaOH + 1.0 M N <sub>2</sub> H <sub>4</sub>  | 358 <sup>m</sup>                          | 6          |
| Ni nano arrays                                          | 3.0 M KOH + 1.0 M N <sub>2</sub> H <sub>4</sub>   | 15 <sup>m</sup>                           | 7          |
| Ni nanoflowers                                          | 3.0 M KOH + 0.5 M N <sub>2</sub> H <sub>4</sub>   | 60 <sup>m</sup>                           | 8          |
| Cu nanowire arrays                                      | 3.0 M NaOH + 1.0M N <sub>2</sub> H <sub>4</sub>   | 310 <sup>m</sup>                          | 9          |
| Ni-Zn/NF                                                | 1.0 M NaOH + 0.1 M N <sub>2</sub> H <sub>4</sub>  | 20 <sup>m</sup>                           | 10         |
| porous Ni-Cu alloy                                      | 3.0 M NaOH + 0.1M N <sub>2</sub> H <sub>4</sub>   | 130 <sup>m</sup>                          | 11         |
| FeP NA/NF                                               | 1.0 M KOH + 0.5 M N <sub>2</sub> H <sub>4</sub>   | 87                                        | 12         |
| Cu <sub>3</sub> P/CF                                    | 1.0 M KOH + 0.5 M N <sub>2</sub> H <sub>4</sub>   | 98                                        | 13         |
| CoS <sub>2</sub> /Ti mesh                               | 1.0 M KOH + 0.1 M N <sub>2</sub> H <sub>4</sub>   | 65 <sup>m</sup>                           | 14         |
| Nanoporous Cu film/Cu plate                             | 3.0 M NaOH + 0.1 M N <sub>2</sub> H <sub>4</sub>  | 311 <sup>m</sup>                          | 15         |
| Flower-like Co nano-particles/NF                        | 1.0 M NaOH + 0.03 M N <sub>2</sub> H <sub>4</sub> | 114 <sup>m</sup>                          | 16         |
| CoSe <sub>2</sub> /NF                                   | 1.0 M KOH + 0.5 M N <sub>2</sub> H <sub>4</sub>   | 70 <sup>m</sup>                           | 17         |
| CoP/TiM                                                 | 1.0 M KOH + 0.1 M N <sub>2</sub> H <sub>4</sub>   | -30 <sup>m</sup>                          | 18         |
| Ni <sub>0.5</sub> Co <sub>0.5</sub> Se <sub>2</sub> /CC | 1.0 M KOH + 0.5 M N <sub>2</sub> H <sub>4</sub>   | 8                                         | This work  |
| Ni <sub>0.3</sub> Co <sub>0.7</sub> Se <sub>2</sub> /CC |                                                   | 30                                        |            |
| Ni <sub>0.7</sub> Co <sub>0.3</sub> Se <sub>2</sub> /CC |                                                   | 24                                        |            |
| NiSe <sub>2</sub> /CC                                   |                                                   | 28                                        |            |
| CoSe <sub>2</sub> /CC                                   |                                                   | 114                                       |            |

CF: Cu foam

NF: Ni foam

CC: Carbon cloth

m: evaluated in its figures

**Table S4.** Lists of applied voltage for H<sub>2</sub> production from water electrolysis assisted by small molecules or biomass oxidation in recent reports

| Catalysts                                                           | Anodic oxidation                    | Electrolytes                                                           | Applied voltage at 10 mA cm <sup>-2</sup> /(V) | Refs      |
|---------------------------------------------------------------------|-------------------------------------|------------------------------------------------------------------------|------------------------------------------------|-----------|
| Ni <sub>3</sub> S <sub>2</sub> /NF <sup>d</sup>                     | 10 mM HMF                           | 1.0 M KOH                                                              | 1.46                                           | 19        |
| Ni <sub>2</sub> P NPA/NF <sup>d</sup>                               | 10 mM HMF                           | 1.0 M KOH                                                              | 1.44                                           | 20        |
| Co-P/CF <sup>d</sup>                                                | 10 mM HMF                           | 1.0 M KOH                                                              | 1.39 <sup>m</sup>                              | 21        |
| hp-Ni <sup>d</sup>                                                  | Benzyl alcohol                      | 1.0 M KOH                                                              | 1.50                                           | 22        |
| Ni <sub>2</sub> P/Ni/NF <sup>d</sup>                                | 30 mM furfural                      | 1.0 M KOH                                                              | 1.48                                           | 23        |
| 3D PdCu alloy NSs <sup>d</sup>                                      | 1.0 M Ethanol                       | 1.0 M KOH                                                              | NG                                             | 24        |
| Ultrathin Co <sub>3</sub> O <sub>4</sub> NSs <sup>d</sup>           | 1.0 M Ethanol                       | 1.0 M KOH                                                              | NG                                             | 25        |
| Zn <sub>0.08</sub> Co <sub>0.92</sub> P <sup>s</sup>                | 0.5 M urea                          | 1.0 M KOH                                                              | 1.38                                           | 26        |
| Ni <sub>2</sub> P NF/CC <sup>s</sup>                                | 0.5 M urea                          | 1.0 M KOH                                                              | 1.15 <sup>m</sup>                              | 27        |
| MnO <sub>2</sub> /MnCo <sub>2</sub> O <sub>4</sub> /Ni <sup>s</sup> | 0.5 M urea                          | 1.0 M KOH                                                              | 1.58                                           | 28        |
| Small-sized MnO <sub>2</sub> <sup>s</sup>                           | 0.5 M urea                          | 1.0 M KOH                                                              | 1.41                                           | 29        |
| CoS <sub>2</sub> NA/Ti <sup>s</sup>                                 | 0.3 M urea                          | 1.0 M KOH                                                              | 1.59                                           | 30        |
| Ni <sub>3</sub> N nanosheet/CC                                      | 0.33 M urea                         | 1.0 M KOH                                                              | 1.44                                           | 31        |
| CuCl/rGO <sup>d</sup>                                               | 0.5 M urea                          | 2.0 M KOH in anode and 0.5 M H <sub>2</sub> SO <sub>4</sub> in cathode | 0.83                                           | 32        |
| NiMoO <sub>4</sub> /NF                                              | 0.5 M urea                          | 1.0 M KOH                                                              | 1.38                                           | 33        |
| CoSe <sub>2</sub> /NF                                               | 0.5 M N <sub>2</sub> H <sub>4</sub> | 1.0 M KOH                                                              | 0.164                                          | 17        |
| NiS <sub>2</sub> /TiM                                               | 0.5 M N <sub>2</sub> H <sub>4</sub> | 1.0 M KOH                                                              | 0.3 <sup>m</sup>                               | 34        |
| Ni <sub>0.5</sub> Co <sub>0.5</sub> Se <sub>2</sub>                 | 0.5 M N <sub>2</sub> H <sub>4</sub> | 1.0 M KOH                                                              | 0.14                                           | This work |
|                                                                     | 0.5 M N <sub>2</sub> H <sub>4</sub> | 1.0 M KOH in anode and 0.5 M H <sub>2</sub> SO <sub>4</sub> in cathode | 0                                              | This work |

CF: Cu foam

NF: Ni foam

CC: Carbon cloth

TiM: Ti mesh

m: evaluated in its figures

**Table S5.** The recorded data for Faradaic Efficiency of H<sub>2</sub> and its evolution rate at a current density of 10 mA cm<sup>-2</sup>

| t/s  | V/mL | n/mol       | EF          | H <sub>2</sub> Evolution rate/ $\mu\text{mol h}^{-1}$ |
|------|------|-------------|-------------|-------------------------------------------------------|
| 424  | 0.5  | 2.04082E-05 | 0.928812091 | 173.2772                                              |
| 824  | 1    | 4.08163E-05 | 0.95586487  | 178.3236                                              |
| 1219 | 1.5  | 6.12245E-05 | 0.969195225 | 180.8107                                              |
| 1613 | 2    | 8.16327E-05 | 0.976605893 | 182.1933                                              |
| 2006 | 2.5  | 0.000102041 | 0.981596028 | 183.1244                                              |
| 2416 | 3    | 0.000122449 | 0.978020678 | 182.4571                                              |
| 2811 | 3.5  | 0.000142857 | 0.980688113 | 182.9545                                              |
| 3224 | 4    | 0.000163265 | 0.977211728 | 182.3058                                              |
| 3629 | 4.5  | 0.000183673 | 0.976673171 | 182.2052                                              |
| 4062 | 5    | 0.000204082 | 0.969513359 | 180.8703                                              |
| 4503 | 5.5  | 0.00022449  | 0.962020784 | 179.4724                                              |
| 4908 | 6    | 0.000244898 | 0.962876104 | 179.6318                                              |
| 5336 | 6.5  | 0.000265306 | 0.959447572 | 178.9921                                              |
| 5760 | 7    | 0.000285714 | 0.95719246  | 178.5713                                              |
| 6168 | 7.5  | 0.000306122 | 0.95772453  | 178.6704                                              |
| 6564 | 8    | 0.000326531 | 0.959942295 | 179.0846                                              |
| 6968 | 8.5  | 0.000346939 | 0.960803322 | 179.2452                                              |
| 7376 | 9    | 0.000367347 | 0.961048519 | 179.2908                                              |

**Table S6.** The zero-point energy (ZPE) values are calculated with the Phonon-5.0.2 module in espresso-5.0,<sup>2</sup> and the molecular entropy values are from Ref. 35. A pressure of 0.035 Bar is included in the entropy of gas-phased H<sub>2</sub>O, for at 300 K, gas-phased H<sub>2</sub>O and the liquid water reach equilibrium under this pressure.

| Species                         | TS (eV) | ZPE (eV) |
|---------------------------------|---------|----------|
| H <sub>2</sub> (g)              | 0.41    | 0.27     |
| N <sub>2</sub> (g)              | 0.61    | 0.17     |
| N <sub>2</sub> H <sub>4</sub> * | 0       | 0.20     |
| N <sub>2</sub> H <sub>3</sub> * | 0       | 0.18     |
| N <sub>2</sub> H <sub>2</sub> * | 0       | 0.16     |
| N <sub>2</sub> H*               | 0       | 0.23     |
| N <sub>2</sub> *                | 0       | 0.22     |

## 6. References:

1. P. Giannozzi, S. B. N. Bonini, M. Calandra, R. Car, C. Cavazzoni, D. Ceresoli, G. L. Chiarotti, M. Cococcioni, I. Dabo, A. Dal Corso, S. Fabris, G. Fratesi, S. de Gironcoli, R. Gebauer, U. Gerstmann, C. Gougoussis, A. Kokalj, M. Lazzeri, L. MartinSamos, N. Marzari, F. Mauri, R. Mazzarello, S. Paolini, A. Pasquarello, L. Paulatto, C. Sbraccia, S. Scandolo, G. Sclauzero, A. P. Seitsonen, A. Smogunov, P. Umari, R. M. Wentzcovitch, *J. Phys.: Condens. Matter.*, 2009, **21**, 395502
2. L. Zhou,, M. Shao, C. Zhang, J. Zhao, S. He, D Rao, X. Duan, *Adv. Mater.*, 2017, **29**, 164080
3. A. Serov, C. Kwak, *Appl. Catal. B Environ.* 2010, **98**, 1-9.
4. M. Fang, G. F. Dong, R. J. Wei, J. C. Ho, *Adv. Energy Mater.*, 2017, 7, 1700559.
5. C. Tang, R. Zhang, W. Lu, Z. Wang, D. Liu, S. Hao, G. Du, A. M. Asiri and X. Sun, *Angew. Chem. Ger. Edit.*, 2017, **129**, 860-864.
6. Z. Lu, M. Sun, T. Xu, Y. Li, W. Xu, Z. Chang, Y. Ding, X. Sun and L. Jiang, *Adv. Mater.*, 2015, **27**, 2361-2366.
7. Y. Kuang, G. Feng, P. Li, Y. Bi, Y. Li and X. Sun, *Angew. Chem. Ger. Edit.*, 2016, **128**, 703-707.
8. G. Feng, Y. Kuang, Y. Li and X. Sun, *Nano Research*, 2015, **8**, 3365-3371.
9. J. Huang, S. Zhao, W. Chen, Y. Zhou, X. Yang, Y. Zhu and C. Li, *Nanoscale*, 2016, **8**, 5810-5814.
10. L.-S. Wu, H.-B. Dai, X.-P. Wen and P. Wang, *ChemElectroChem*, 2017, **4**, 1944-1949.
11. M. Sun, Z. Lu, L. Luo, Z. Chang and X. Sun, *Nanoscale*, 2016, **8**, 1479-1484.
12. L. Zhang, D. Liu, S. Hao, L. Xie, F. Qu, G. Du, A. M. Asiri and X. Sun, *ChemistrySelect*, 2017, **2**, 3401-3407.
13. M. Liu, R. Zhang, L. Zhang, D. Liu, S. Hao, G. Du, A. M. Asiri, R. Kong and X. Sun, *Inorg. Chem. Front.*, 2017, **4**, 420-423.
14. X. Ma, J. Wang, D. Liu, R. Kong, S. Hao, G. Du, A. M. Asiri and X. Sun, *New J. Chem.*, 2017, **41**, 4754-4757.
15. F. Jia, J. Zhao and X. Yu, *J. Power Sources*, 2013, **222**, 135-139.
16. F. Yang, K. Cheng, G. Wang and D. Cao, *J. Electroanal. Chem.*, 2015, **756**, 186-192.
17. J. Y. Zhang, H. Wang, Y. Tian, Y. Yan, Q. Xue, T. He, H. Liu, C. Wang, Y. Chen and B. Y. Xia, *Angew. Chem. Int. Ed.*, 2018, **57**, 7649-7653.
18. J. Wang, R. Kong, A. M. Asiri and X. Sun, *ChemElectroChem*, 2017, **4**, 481-484.
19. B. You, X. Liu, N. Jiang and Y. Sun, *J. Am. Chem. Soc.*, 2016, **138**, 13639-13646.
20. B. You, N. Jiang, X. Liu and Y. Sun, *Angew. Chem. Ger. Edit.*, 2016, **128**, 10067-10071.
21. N. Jiang, B. You, R. Boonstra, I. M. Terrero Rodriguez and Y. Sun, *ACS Energy Lett.*, 2016, **1**, 386-390.
22. B. You, X. Liu, X. Liu and Y. Sun, *ACS Catal.*, 2017, **7**, 4564-4570.
23. N. Jiang, X. Liu, J. Dong, B. You, X. Liu and Y. Sun, *ChemNanoMat*, 2017, **3**, 491-495.
24. X. Zhao, L. Dai, Q. Qin, F. Pei, C. Hu and N. Zheng, *Small*, 2017, **13**, 1602970.
25. L. Dai, Q. Qin, X. Zhao, C. Xu, C. Hu, S. Mo, Y. O. Wang, S. Lin, Z. Tang and N. Zheng, *ACS Cent. Sci.*, 2016, **2**, 538-544.
26. T. T. Liu, D. N. Liu, F. L. Qu, D. X. Wang, L. Zhang, R. X. Ge, S. Hao, Y. J. Ma, G. Du,



- A. M. Asiri, L. Chen and X. P. Sun, *Adv. Energy Mater.*, 2017, **7**, 1700020.
27. D. Liu, T. Liu, L. Zhang, F. Qu, G. Du, A. M. Asiri and X. Sun, *J. Mater. Chem. A*, 2017, **5**, 3208-3213.
28. C. Xiao, S. Li, X. Zhang and D. R. MacFarlane, *J. Mater. Chem. A*, 2017, **5**, 7825-7832.
29. S. Chen, J. Duan, A. Vasileff and S. Z. Qiao, *Angew. Chem. Ger. Edit.*, 2016, **128**, 3868-3872.
30. S. Wei, X. Wang, J. Wang, X. Sun, L. Cui, W. Yang, Y. Zheng and J. Liu, *Electrochim Acta*, 2017, **246**, 776-782.
31. Q. Liu, L. Xie, F. Qu, Z. Liu, G. Du, A. M. Asiri and X. Sun, *Inorg. Chem. Front.*, 2017, **4**, 1120-1124.
32. G. Wang, J. Chen, Y. Li, J. Jia, P. Cai and Z. Wen, *Chem. Commun.*, 2018, **54**, 2603-2606.
33. Z.-Y. Yu, C.-C. Lang, M.-R. Gao, Y. Chen, Q.-Q. Fu, Y. Duan and S.-H. Yu, *Energ. Environ. Sci.*, 2018, **11**, 1890-1897.
34. J. Wang, X. Ma, T. Liu, D. Liu, S. Hao, G. Du, R. Kong, A. M. Asiri and X. Sun, *Mater. Today Energy*, 2017, **3**, 9-14.
35. Weast, R. C., Ed. *CRC Handbook of Chemistry and Physics*, 49th ed.; The Chemical Rubber Company: Cleveland, OH, 1968-1969; p D109.
